# Supplementary material
Source: publisher figshare collection journal article supplement (https://acs.figshare.com/ndownloader/files/4329937)
Supplement: Supplementary file 1 [file 4329937]

SUPPORTING INFORMATION FOR

PbS as a highly catalytic counter electrode for  
polysulfide based quantum dot solar cells

*Zion Tachan, Menny Shalom, Idan Hod, Sven Rühle, Shay Tirosh, Arie Zaban*

Institute of Nanotechnology & Advanced Materials, Dept. of Chemistry,

Bar Ilan University, 52900 Ramat Gan, Israel

e-mail address: [zabana@mail.biu.ac.il](mailto:zabana@mail.biu.ac.il)

Similar results were achieved with CdS sensitized electrodes which were prepared as follows:

### **TiO<sub>2</sub> electrode preparation - EPD**

Electrodes for CdS sensitization were prepared by the electrophoretic deposition (EPD)<sup>1</sup> of Degussa P25 particles with an average particle diameter of 25 nm. The particles were deposited through two consecutive cycles of 30 seconds at a constant current density of 0.5 mA/cm<sup>2</sup>, with a drying step at 120 °C for 5 min between each cycle. Following the EPD process, these electrodes were dried in air at 150 °C for 30 min, pressed at 800 kg/cm<sup>2</sup> using an hydraulic press, and sintered at 550°C for 1 hour. The thickness of the EPD electrodes was 5 microns measured by the profilometer (Surftest SV-500).

### **CdS QD deposition –**

For CdS QDs deposition by CBD method firstly introduced by hodes<sup>2</sup> The electrodes were immersed in a mixture of 0.5 M CdSO<sub>4</sub> and 0.7 M potassium nitrilotriacetate (K<sub>3</sub>NTA) at pH 8.5 adjusted by 10% KOH. This solution was mixed with of 0.4 M thiourea and then diluted with distilled water to a final volume of 100ml. Finally, the pH was readjusted to pH 11 using again 10% KOH. After the electrode was immersed into the solution, it was heated up to 70 °C for two hours, resulting in CdS deposition on the mesoporous TiO<sub>2</sub> electrode.

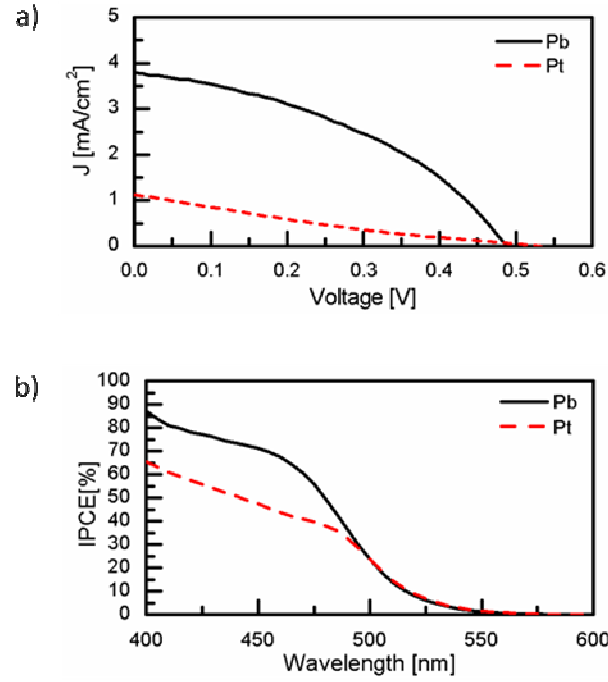

Figure 1: (a) The I-V measurements of CdS quantum dot sensitized solar cell based on PbS and Pt CE's. (b) Incident photon to electron conversion efficiencies (IPCE).

| Counter in use | P(max) | Voc(mV) | Jsc(mA/cm <sup>2</sup> ) | Fill factor |
|----------------|--------|---------|--------------------------|-------------|
| PbS            | 743    | 484     | 3.81                     | 40.3        |
| Pt             | 119    | 514     | 1.160                    | 19.9        |

Table 1: Summarizes the parameters for the I-V scan showing a 6-fold increase of the conversion efficiency ending up with 0.74% which achieved by replacing the Pt-CE to PbS. (Error estimation is approximately 1%)

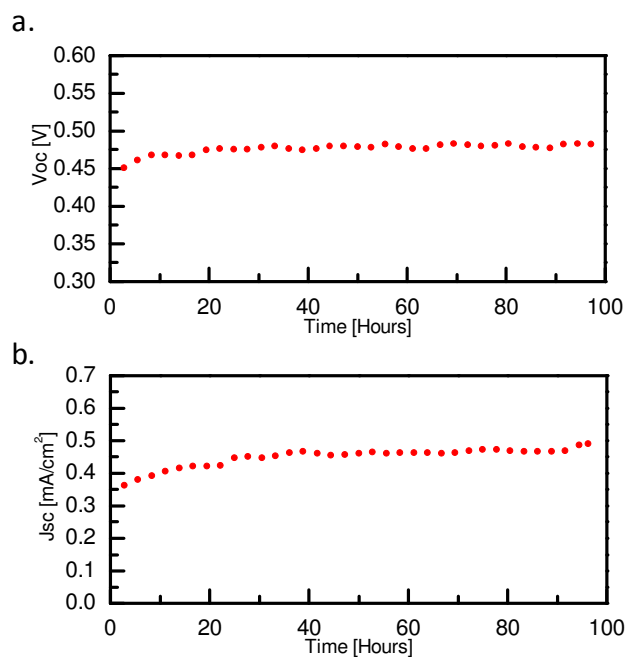

*Figure 2: Stability measurements of CdSe sensitized solar cell. (a)  $V_{oc}$  vs time measurement. (b) Short circuit current vs time measurement. All measurements were made in a closed Teflon cell under illumination intensity for 100 hours.*

#### References:

- (1) Grinis, L.; Dor, S.; Ofir, A.; Zaban, A. *Journal of Photochemistry and Photobiology a-Chemistry* **2008**, 198, 52.
- (2) Gorer, S.; Hodes, G. *Journal of Physical Chemistry* **1994**, 98, 5338.
